# Supplementary material for: Inorganic pyrophosphatase activity in a plaque calcifying microorganism: Bacterionema matruchotii.
Source: Royal Society of Chemistry journal article supplement (doi:10.1039/c6sm02380k), 1986-09-01
Supplement: c6sm02380k1.pdf [file c6sm02380k1.pdf]

## SUPPORTING INFORMATION

# Controlled and Tunable Design of Polymer Interface for Immobilisation of Enzymes: Does Curvature Matter?

*Claudia Marschelke<sup>1,2</sup>, Ivan Raguzin<sup>1</sup>, Anke Matura<sup>3</sup>, Andreas Fery<sup>1,2</sup>, and Alla Synytska<sup>1,2\*</sup>*

<sup>1</sup>Leibniz Institute of Polymer Research Dresden e.V., Hohe Str. 6, 01069 Dresden, Germany

<sup>2</sup>Dresden University of Technology, Faculty of Mathematics and Science, Institute of Physical Chemistry and Polymer Physics, 01062, Dresden, Germany

<sup>3</sup>Dresden University of Technology, Faculty of Mathematics and Science, Institute of Biochemistry, 01062, Dresden, Germany

**Keywords:** Core-shell particles, stimuli-responsive particles, polymer brushes, grafting density, polymer interface, enzyme immobilisation, laccase

### Corresponding Author

\* E-mail: [synytska@ipfdd.de](mailto:synytska@ipfdd.de) (A.S.)

Tel.: +49 (0351) 4658 475

Fax: +49 (0351) 4658 474

**Table S1.** List of the synthesized flat reference samples with their corresponding parameters.

| Sample ID        | thickness <sup>dry</sup><br>[nm] | thickness <sup>swollen</sup><br>[nm] | Swelling ratio | M <sub>n</sub><br>[g/mol] | Grafting<br>density<br>[nm <sup>-2</sup> ] |
|------------------|----------------------------------|--------------------------------------|----------------|---------------------------|--------------------------------------------|
| Flat PDMAEMA-100 | 51.9                             | 175.4                                | 3.38           | 62 000                    | 0.66                                       |
| Flat PDMAEMA-50  | 25.3                             | 102.0                                | 4.03           | 59 000                    | 0.34                                       |
| Flat PDMAEMA-25  | 12.5                             | 40.9                                 | 3.27           | 50 000                    | 0.20                                       |
| Flat PDMAEMA-10  | 4.2                              | 9.5                                  | 2.25           | 62 000                    | 0.05                                       |

**Table S2.** List of the synthesised core-shell particles with their corresponding parameters.

| Sample ID          | Core size | Size <sup>DLS</sup><br>[nm] | Shell<br>thickness <sup>TGA</sup><br>[nm] | M <sub>n</sub><br>[g/mol] | Grafting<br>density<br>[nm <sup>-2</sup> ] |
|--------------------|-----------|-----------------------------|-------------------------------------------|---------------------------|--------------------------------------------|
| 800 nm-PDMAEMA-100 | 800 nm    | 3115                        | 46                                        | 37 000                    | 0.83                                       |
| 800 nm-PDMAEMA-50  | 800 nm    | 2933                        | 20                                        | 61 000                    | 0.21                                       |
| 800 nm-PDMAEMA-25  | 800 nm    | 2243                        | 9                                         | 56 000                    | 0.10                                       |
| 800 nm-PDMAEMA-10  | 800 nm    | 1549                        | 2                                         | 40 000                    | 0.04                                       |

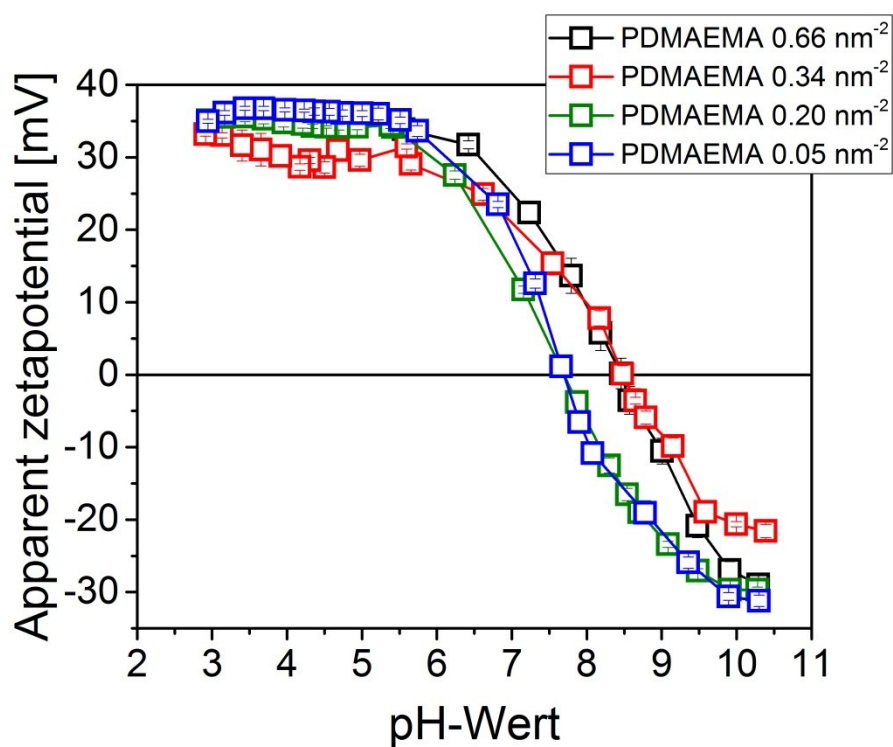

**Figure S1.** Apparent zeta potential as a function of pH for planar PDMAEMA brushes with different grafting densities.

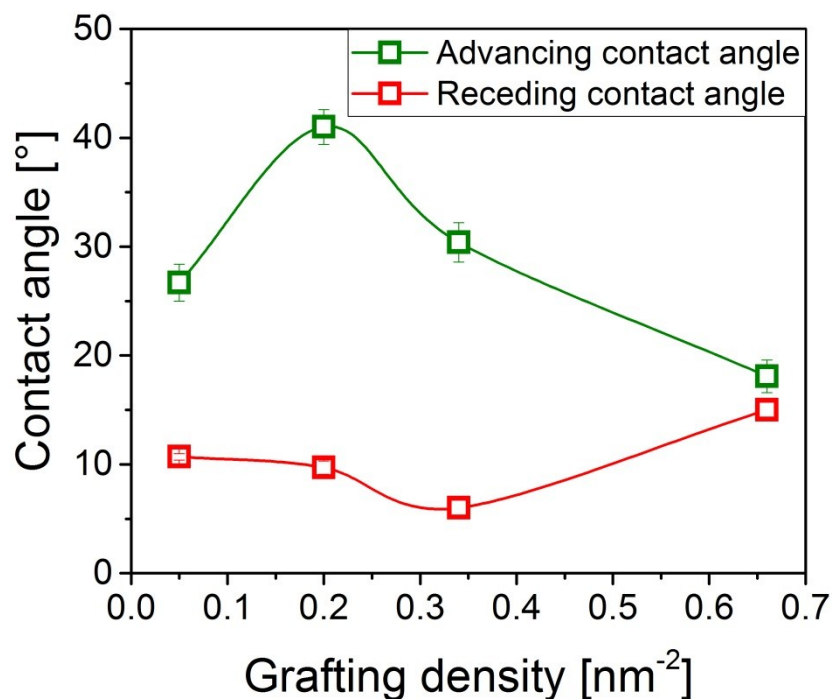

**Figure S2.** Advancing and receding contact angles on PDMAEMA-modified surfaces determined by ADSA captive bubble measurements at pH 3.

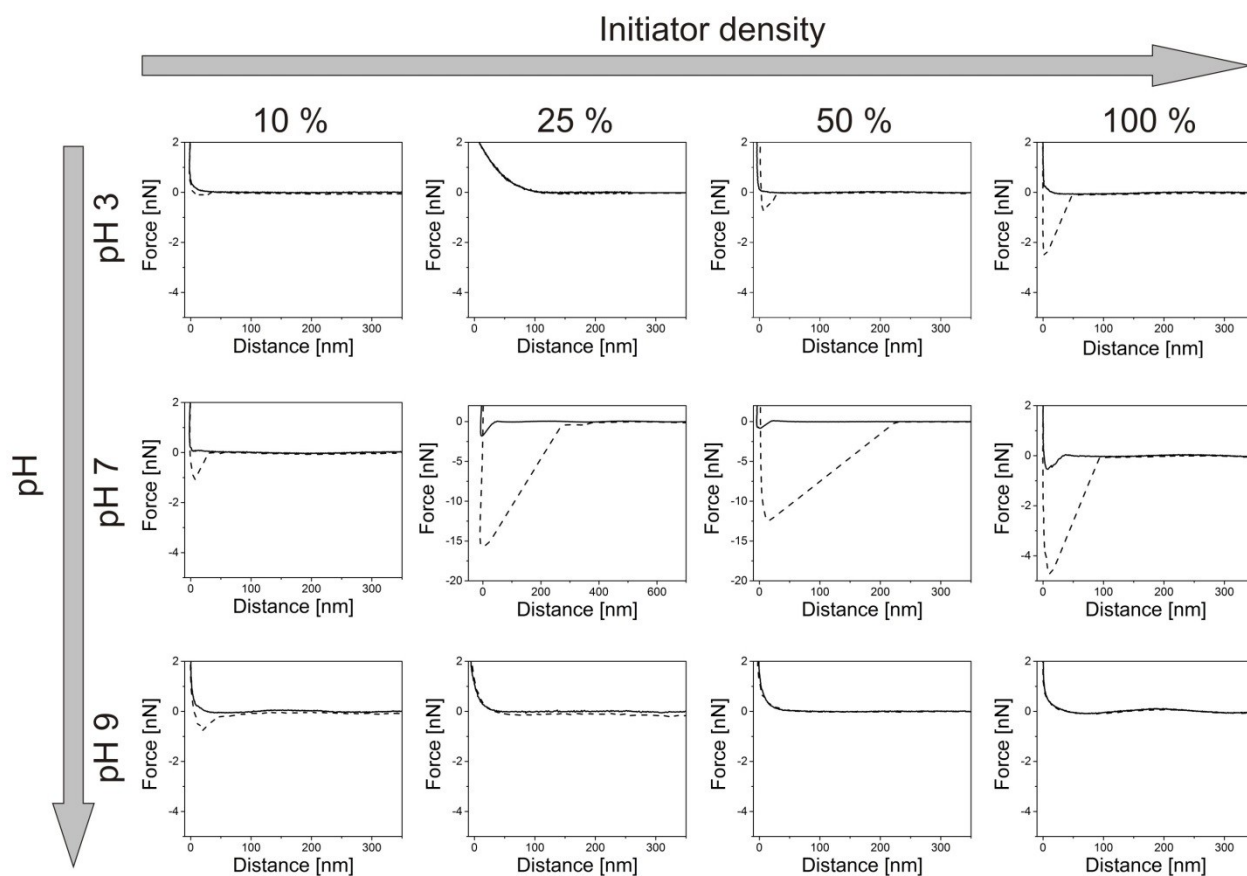

**Figure S3.** AFM force-distance curves taken measured at pH 3, 7 and 9 for PDMAEMA brushes with different grafting densities on planar substrates. Solid line: approaching curve; dashed line: retraction curve.

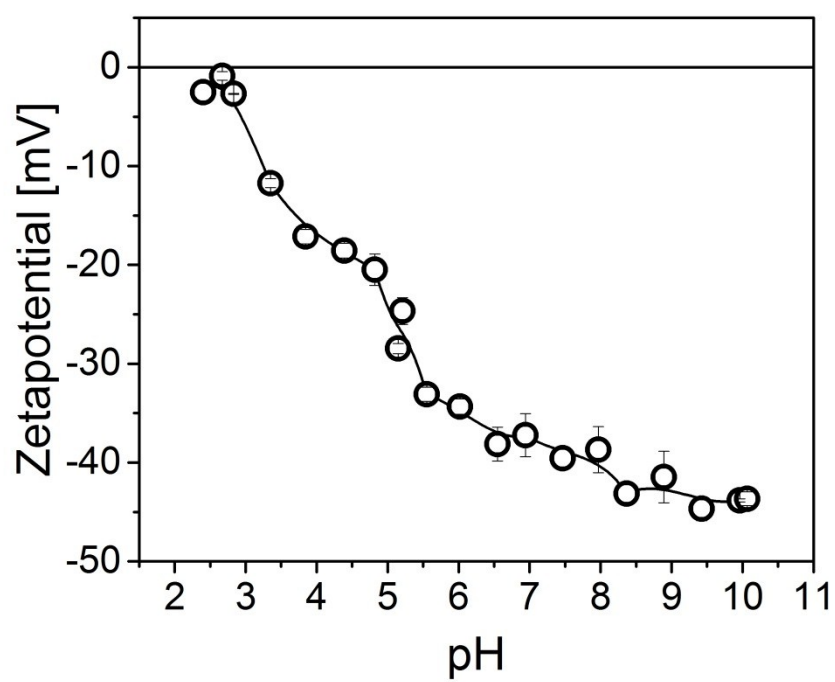

**Figure S4.** Zetapotential of laccase from *Trametes versicolor* versus pH.

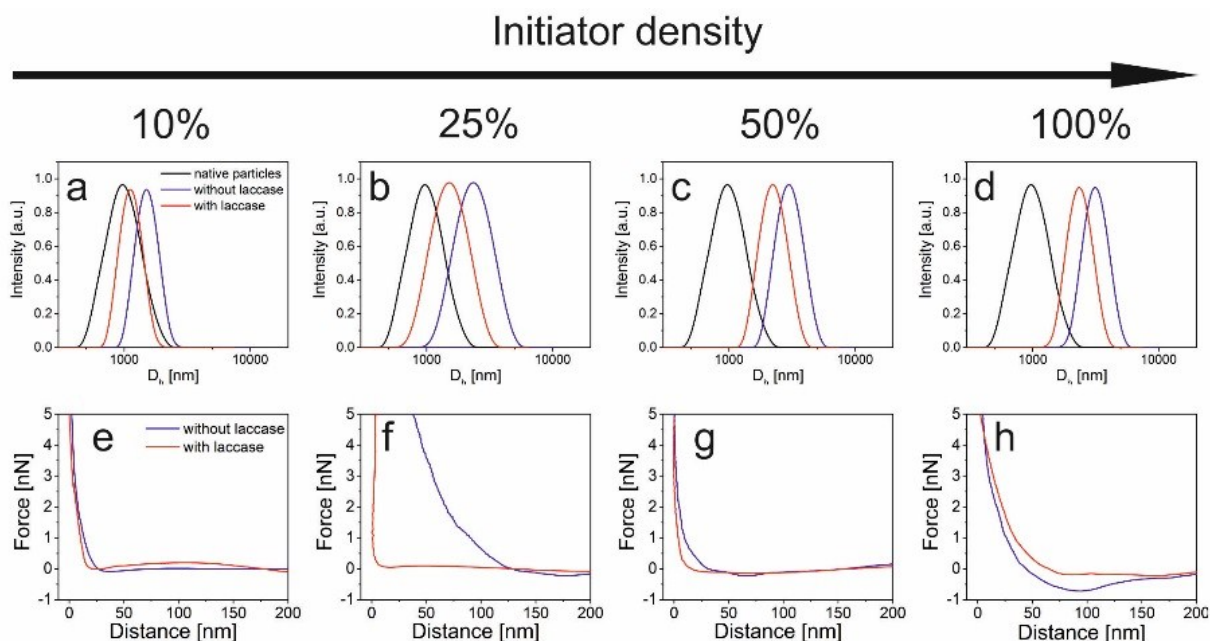

**Figure S5.** Particle size distributions (DLS) (S4a-d) and force distance curves (S4e-h) of PDMAEMA-modified particles (core diameter 800 nm) with different grafting densities before (blue lines) and after immobilisation (red lines) of laccase. All measurements were carried out in acetate buffer solution  $10^{-2}$  M at pH 4.

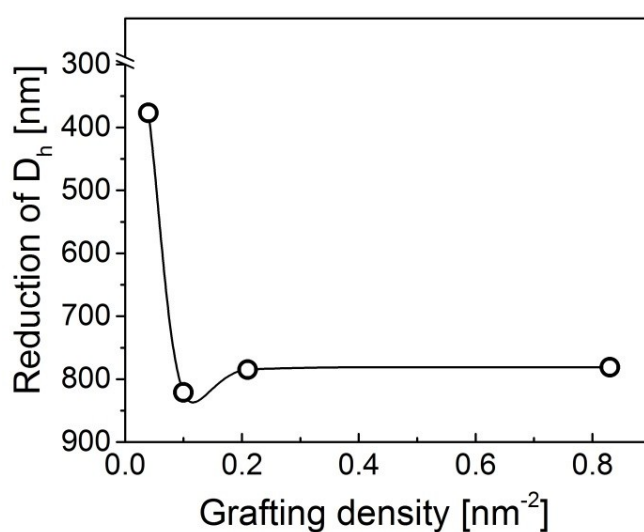

**Figure S6.** Change of the hydrodynamic diameter of PDMAEMA-modified particles (core diameter 800 nm) after loading with laccase versus grafting density.

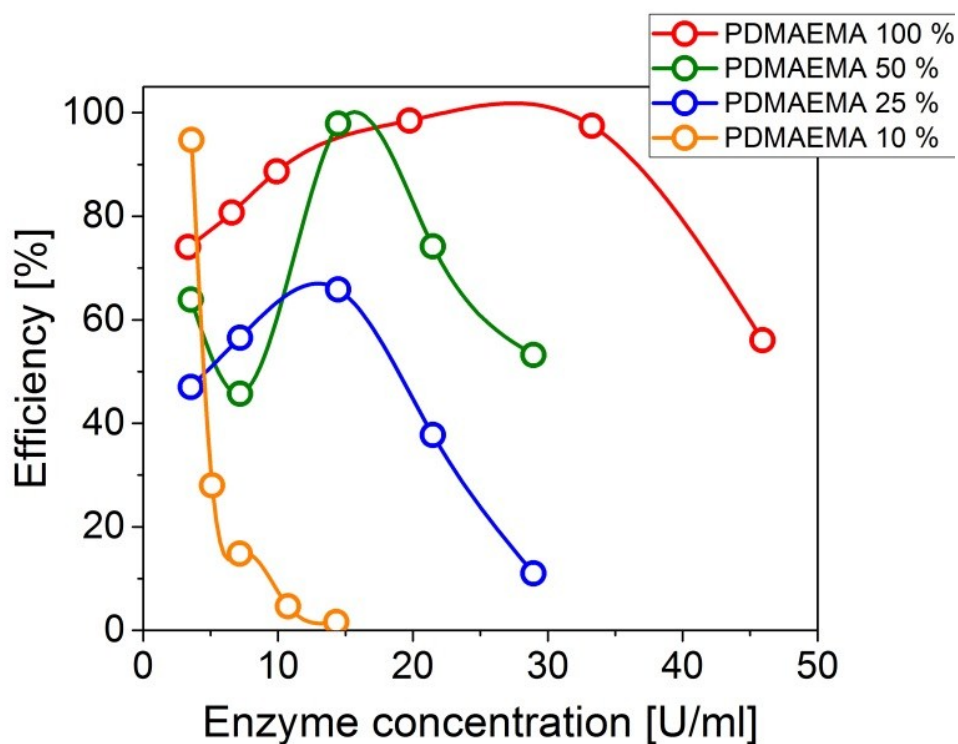

**Figure S7.** Efficiency of the immobilisation on PDMAEMA-modified particles (core diameter 800 nm) versus enzyme concentration.

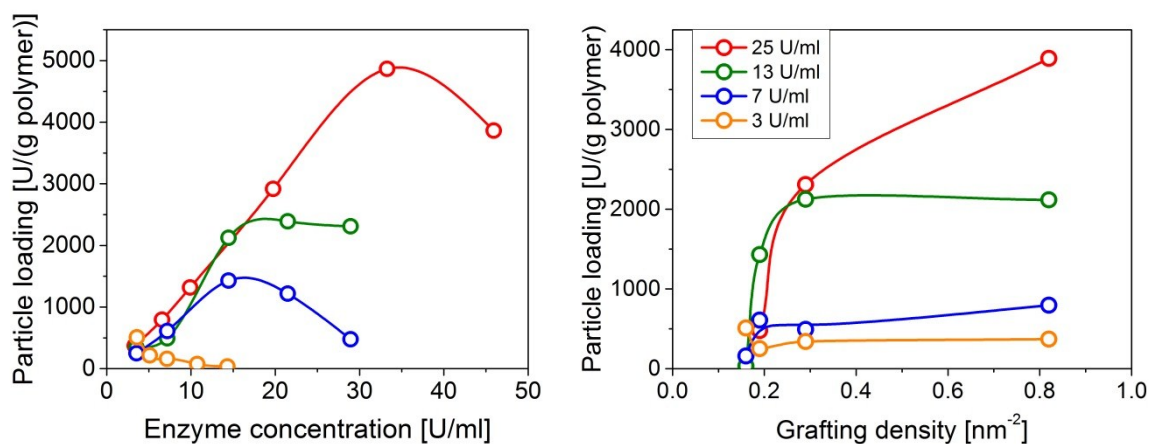

**Fig. S8.** Particle loading with laccase versus enzyme concentration (left) and grafting density (right).
